# Supplementary material
Source: Research Square preprint supplement (doi:10.21203/rs.3.rs-10120177/v1)
Supplement: Supplementary file 1 [file 841e63ca29e7f039b36c7cf5.pdf]

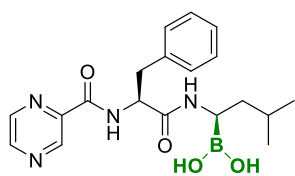

**Bortezomib** (FDA 2003)  
Proteasome inhibitor  
*Multiple myeloma*

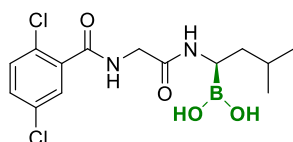

**Ixazomib** (FDA 2015)  
Proteasome inhibitor  
*Multiple myeloma*

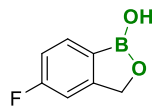

**Tavaborole** (FDA 2014)  
leucyl-tRNA synthetase inhibitor  
*onychomycosis (fungal nail infection)*

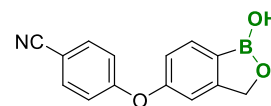

**Crisaborole** (FDA 2016)  
PDE4-inhibitor  
*atopic dermatitis*

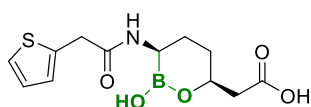

**Vaborbactam** (FDA 2017)  
serine  $\beta$ -lactamase inhibitor  
*antibacterial, complicated urinary tract infections*

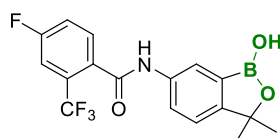

**Acoziborole** (EMA 2026)  
CPSF3 endonuclease inhibitor  
*T.b. gambiense (sleeping sickness)*

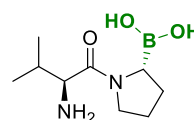

**Talabostat** (Phase II)  
DPP inhibitor (including FAP, DPP8, and DPP9)  
*Advanced solid cancers*

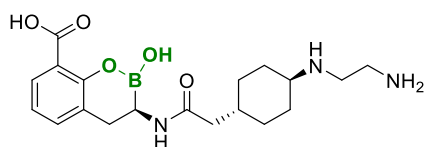

**Taniborbactam** (Phase III)  
"pan-spectrum"  $\beta$ -lactamase inhibitor  
*antibacterial, complicated urinary tract infections*

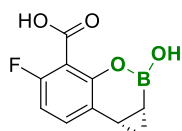

**Xeruborbactam** (Phase I)  
"pan-spectrum"  $\beta$ -lactamase inhibitor  
*antibacterial, complicated urinary tract infections*

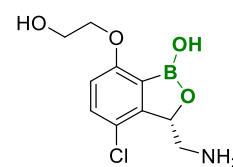

**Ganfeborole** (Phase II)  
leucyl-tRNA synthetase inhibitor  
*Antibacterial, Tuberculosis*

**Supplementary Figure 1: Boron containing compounds currently approved or in clinical trials**

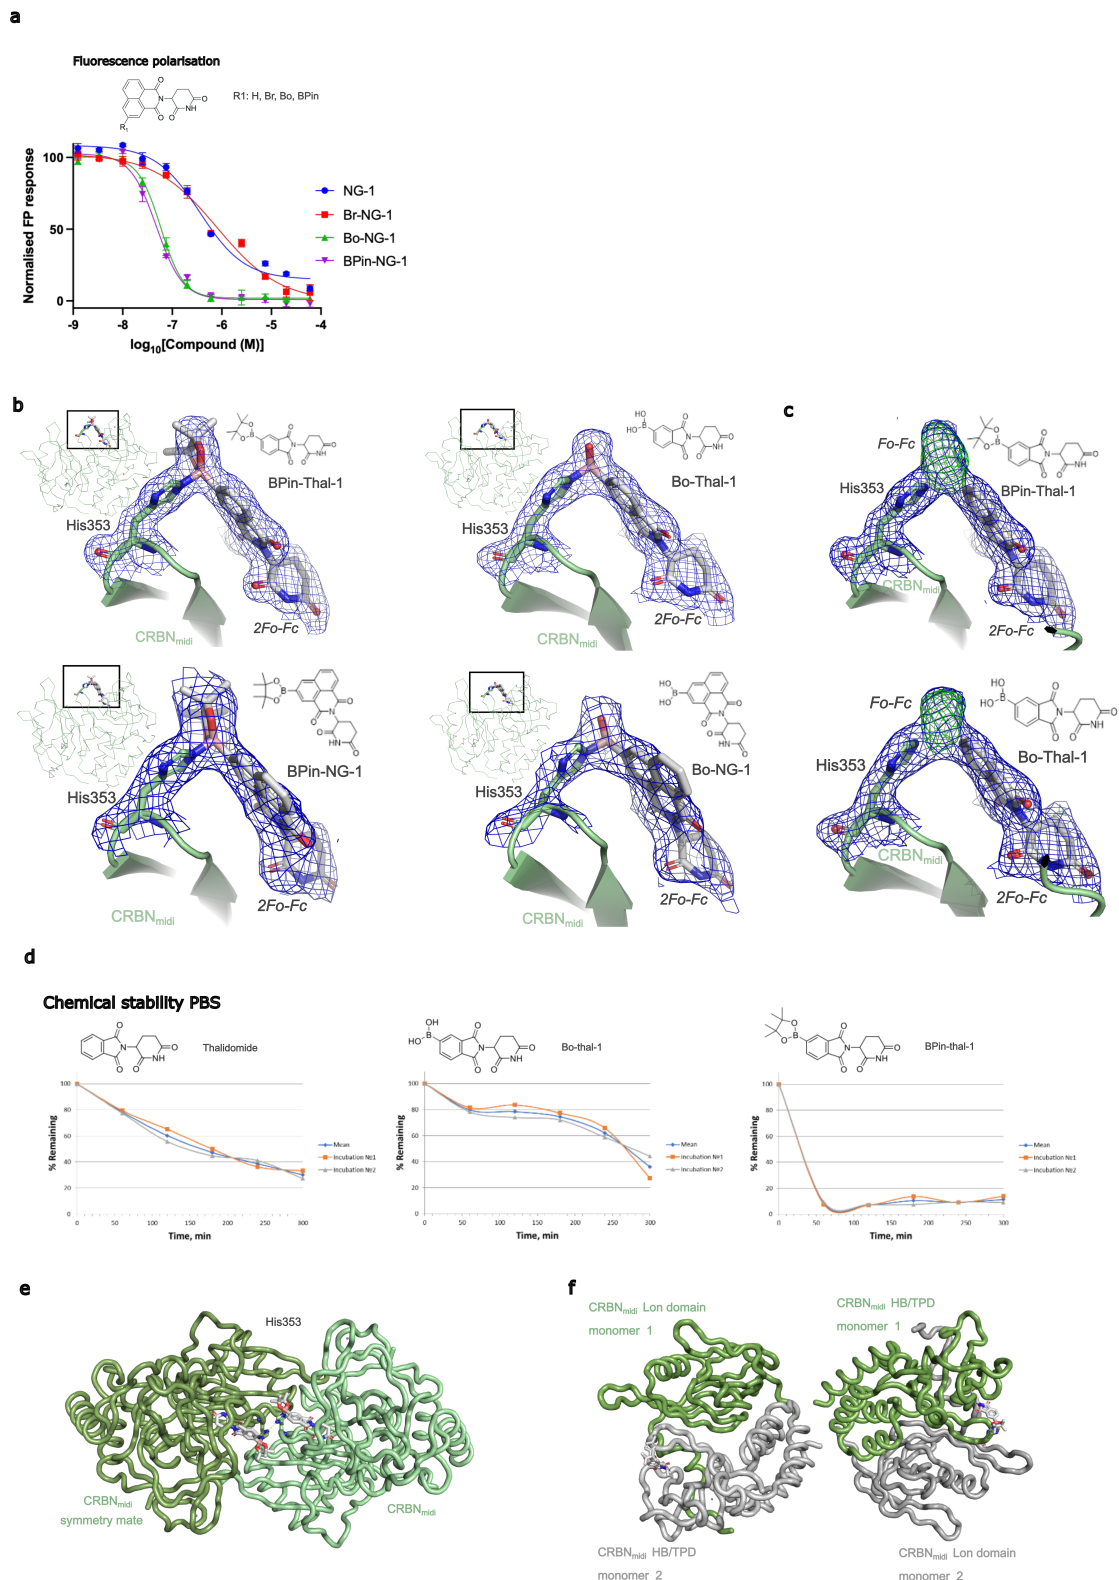

**Supplementary Figure 2: Crystal structure and ligand binding validation.** **A)** Competitive fluorescence polarization assay comparing IC<sub>50</sub>s of naphthylamide glutarimide Bo-IMiDs (Bo-NG-1 and BPin-NG-1; R1 = Bo/BPin, R2 = H) against equivalent unmodified (NG-1; R1 and R2 = H) or bromine modified (Br-NG-1; R1 = Br, R2 = H) control compounds **B)** Crystal structures of CRBN<sub>midi</sub> (green) in complex with BPin-Thal-1, Bo-Thal-1, BPin-NG-1 and Bo-NG-1 (grey), respectively. Blue mesh represents 2Fo-Fc electron density map of ligands covalently bound to His353, contoured at 1 $\sigma$ . **C)** Omit maps of the CRBN-midi after deletion of boronate group contoured at 1 $\sigma$  (BPin-Thal-1 top and Bo-Thal-1 bottom). **D)** Chemical stability analysis of Thalidomide, Bo-Thal-1 and BPin-Thal-1 in PBS buffered at 7.4. **E)** Crystallographic symmetry mate showing direct head-to-head interaction commonly captured in binary CRBM-midi structures. **F)** Crystallographic symmetry mate showing common domain swap in CRBN-midi binary ligand structures.

**Supplementary Table 1: Crystallographic statistics**

| Dataset                                          | Bo-Thal-1            | BPin-Thal-1          | Bo-NG-1              | BPin-NG-1            | Bo-ARV-825            | BPin-PDU-3           | BPin-PDU-1             | PBin-PG-1            |
|--------------------------------------------------|----------------------|----------------------|----------------------|----------------------|-----------------------|----------------------|------------------------|----------------------|
| Beamline                                         | Diamond beamline I04  | Diamond beamline I03 | Diamond beamline I03   | Diamond beamline I03 |
| Wavelength (Å)                                   | 0.95374              | 0.95374              | 0.95374              | 0.95374              | 0.95374               | 0.97627              | 0.97627                | 0.97625              |
| Unit cell parameters (Å) (a, b, c)               | 52.78, 94.99, 149.17 | 52.39, 95.70, 151.28 | 52.68, 95.45, 148.22 | 52.45, 95.52, 151.75 | 53.93, 100.04, 111.35 | 53.40, 94.78, 146.07 | 52.769, 94.662, 147.31 | 52.8, 95.04, 145.92  |
| ( $\alpha$ , $\beta$ , $\gamma$ )                | 90°, 90°, 90°        | 90°, 90°, 90°        | 90°, 90°, 90°        | 90°, 90°, 90°        | 90°, 90°, 90°         | 90°, 90°, 90°        | 90°, 90°, 90°          | 90°, 90°, 90°        |
| Space group                                      | <i>C</i> 2 2 21      | <i>C</i> 2 2 21      | <i>P</i> 21 21 21    | <i>C</i> 2 2 21      | <i>P</i> 21 21 21     | <i>P</i> 21 21 21    | <i>C</i> 2 2 21        | <i>P</i> 21 21 21    |
| Resolution range (Å)                             | 49.72 - 1.8          | 50.43 - 1.7          | 49.41 - 2.2          | 47.76 – 2.2          | 74.41 - 2.8*          | 94.78 - 2.8          | 73.65 - 2.5*           | 72.96 - 2.4          |
| Unique reflections                               | 25793                | 30493                | 48443                | 23370                | 16702                 | 14676                | 9094                   | 31421                |
| CC(1/2): Overall (Outershell)                    | 0.998 (0.615)        | 0.999 (0.634)        | 0.999 (0.617)        | 0.999 (0.508)        | 0.979 (0.744)         | 0.994 (0.538)        | 0.999 (0.529)          | 0.005 (0.521)        |
| I/sig(I): Overall (Outershell)                   | 12.1 (1.0)           | 10.9 (0.9)           | 12.4 (1.5)           | 11.4 (1.0)           | 6.4 (1.6)             | 5.5 (0.9)            | 10.4 (1.1)             | 10.8 (0.8)           |
| Completeness Spherical (%): Overall (Outershell) | 99.9 (99.7)          | 100 (100)            | 99.8 (100)           | 100 (100)            | 50.9 (8.3)*           | 100 (100)            | 71.6 (17.4)*           | 99.9 (99.7)          |
| Multiplicity: Overall (Outershell)               | 13.5 (14.0)          | 12.9 (12.1)          | 13.4 (13.3)          | 13.4 (13.3)          | 12.8 (13.2)           | 13.1 (13.9)          | 12.9 (13.8)            | 13.6 (12.8)          |
| $R_{\text{cryst}}$ (%)                           | 23.79                | 19.32                | 22.82                | 23.15                | 21.07                 | 25.49                | 22.90                  | 24.11                |
| $R_{\text{free}}$ (%)                            | 27.13                | 23.17                | 26.35                | 25.99                | 26.60                 | 29.23                | 28.01                  | 29.15                |
| Wilson <i>B</i> factor (Å <sup>2</sup> )         | 32.19                | 27.47                | 42.57                | 48.05                | 40.19                 | 58.61                | 55.95                  | 63.53                |
| Average total <i>B</i> factor (Å <sup>2</sup> )  | 55.1                 | 41.7                 | 58.1                 | 66.8                 | 38.1                  | 74.3                 | 62.6                   | 81.2                 |
| R.m.s.d. bond length (Å <sup>2</sup> )           | 0.013                | 0.017                | 0.005                | 0.002                | 0.003                 | 0.003                | 0.004                  | 0.006                |
| R.m.s.d. bond angle (°)                          | 1.430                | 1.475                | 0.834                | 0.536                | 0.509                 | 0.690                | 0.642                  | 0.850                |
| Clashscore                                       | 9.81                 | 5.26                 | 5.05                 | 4.82                 | 7.94                  | 9.38                 | 7.80                   | 9.06                 |
| Ramachadran favored (%)                          | 97.48                | 98.12                | 97.79                | 95.91                | 97.65                 | 96.81                | 97.13                  | 97.77                |
| Ramachandran disallowed (%)                      | 0.0                  | 0.0                  | 0.0                  | 0.0                  | 0.0                   | 0.0                  | 0.32                   | 0.0                  |
| Rotamer outliers (%)                             | 1.47                 | 1.44                 | 2.3                  | 1.85                 | 1.74                  | 2.37                 | 0.40                   | 2.82                 |
| PDB code                                         | 31LZ                 | 31MA                 | 31MC                 | 31MB                 | 31MG                  | 31ME                 | 31MD                   | 31MF                 |



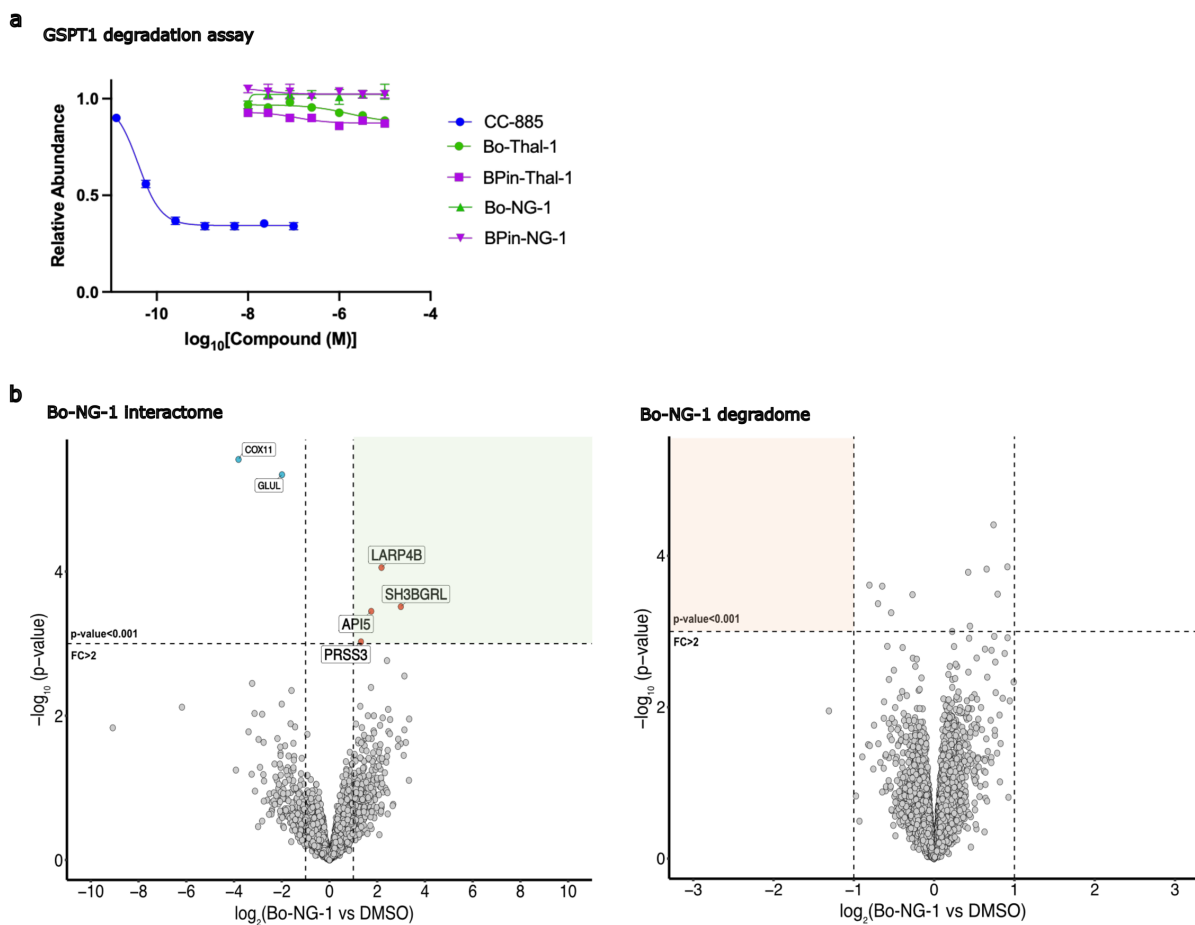

**Supplementary Figure 3: Molecular Glue profiling.** **A)** GSPT1 degradation curves for modified thalidomide and naphthylamide glutarimide series. Data are presented as  $\pm$  SD ( $n = 2$ ). **B)** Scatterplot displaying relative FC in protein enrichment after FLAG-tagged CRBN\_ΔHBD pulldown with incubation of 5  $\mu$ M Bo-Thal-1 vs. DMSO control in MOLT4 lysates (left). Scatterplot displaying relative FC in protein abundance following treatment of MOLT-4 cells for 5h with 1  $\mu$ M Bo-Thal-1 vs. DMSO (right). Proteomic hits are identified via fold-change above 2 and  $\log_{10}$  p value below 0.001 ( $n = 3$ ).

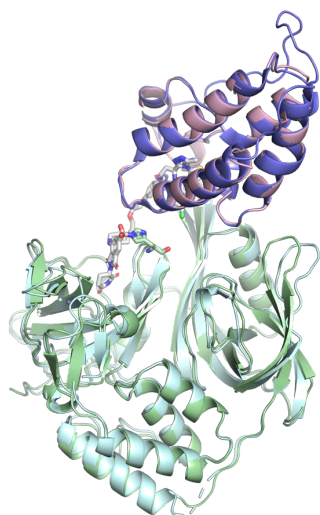

**Supplementary Figure 4:** Structure overlay of CRBN-midi Bo-Thal-1 crystal structure (cyan) and BRD4 JQ1 bound structure (PDB3MXF)(blue) with the Bo-ARV-825 ternary complex structure (green/pink).

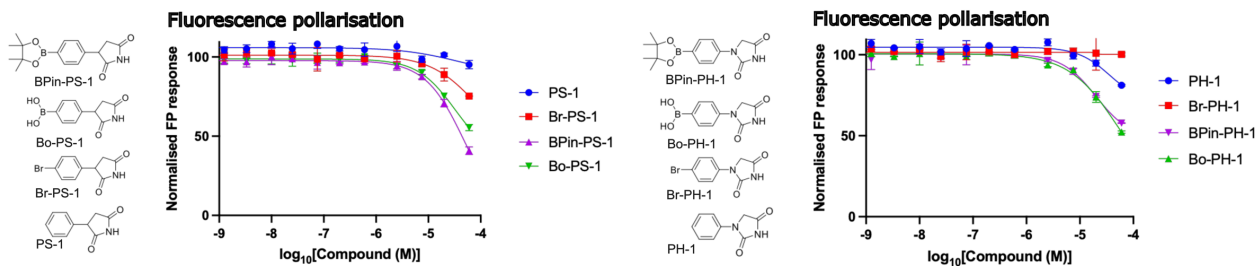

**Supplementary Figure 5:** Competitive fluorescence polarization assay comparing IC<sub>50</sub>s of 5 member ring PS and PH Bo-IMiDs vs Br and unmodified controls. Data are presented as ± SD (n = 2).

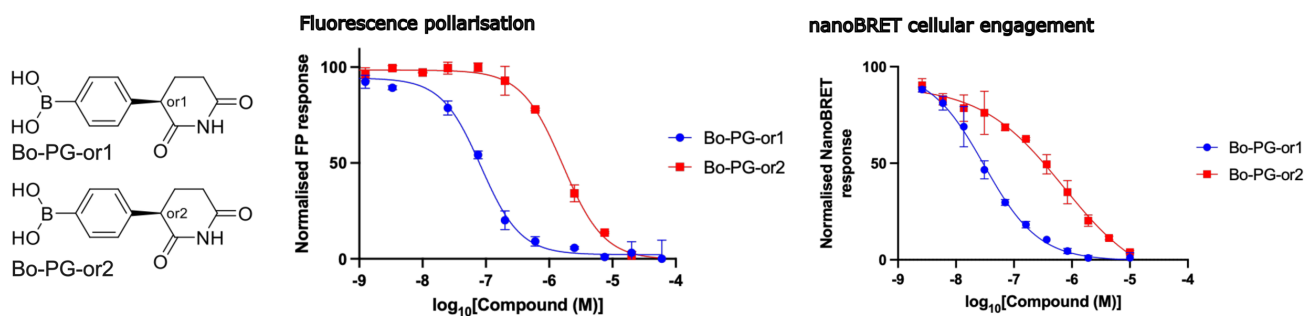

**Supplementary Figure 6:** Competitive fluorescence polarization assay and NanoBRET cellular engagement assay comparing IC<sub>50</sub>s of isolated Bo-PG-1 enantiomers (Bo-PG-or1 and Bo-PG-or2). Data are presented as ± SD (n = 2).

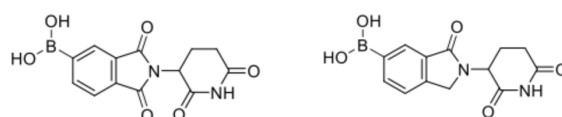

**Bo-Thalidomide-1**

**Bo-EM-12-1**

|                                                                                       | <b>Bo-Thalidomide-1</b> | <b>Bo-EM-12-1</b>  |
|---------------------------------------------------------------------------------------|-------------------------|--------------------|
| <b>Molecular Weight</b>                                                               | <b>302,0</b>            | <b>288.1</b>       |
| <b>TPSA</b>                                                                           | <b>124.01</b>           | <b>106.94</b>      |
| <b>cLog P</b>                                                                         | <b>-0.019</b>           | <b>-0.242</b>      |
| <b>kinetic solubility, pH 7.4, μM</b>                                                 | <b>379±2</b>            | <b>335±1</b>       |
| <b>Plasma stability ( T<sub>1/2</sub>, min)</b>                                       | <b>347</b>              | <b>530</b>         |
| <b>HLM stability ( T<sub>1/2</sub>, min)</b>                                          | <b>163.7</b>            | <b>287.6</b>       |
| <b>Caco-2 permeability, P<sub>app</sub> (AB), 10<sup>-6</sup> cm/s (efflux ratio)</b> | <b>&lt;1 (5.9)</b>      | <b>&lt;1 (5.3)</b> |

**Supplementary Figure 7:** Table comparing ADME properties of Bo-IMiDs: Bo-Thal-1 and Bo-EM12-1.
